# Supplementary material
Source: PubMed Central journal article supplement (PMC3647463)
Supplement: NIHMS462206-supplement-01.pdf [file NIHMS462206-supplement-01.pdf]

**Figure S1 (Supplementary Online Figure)**

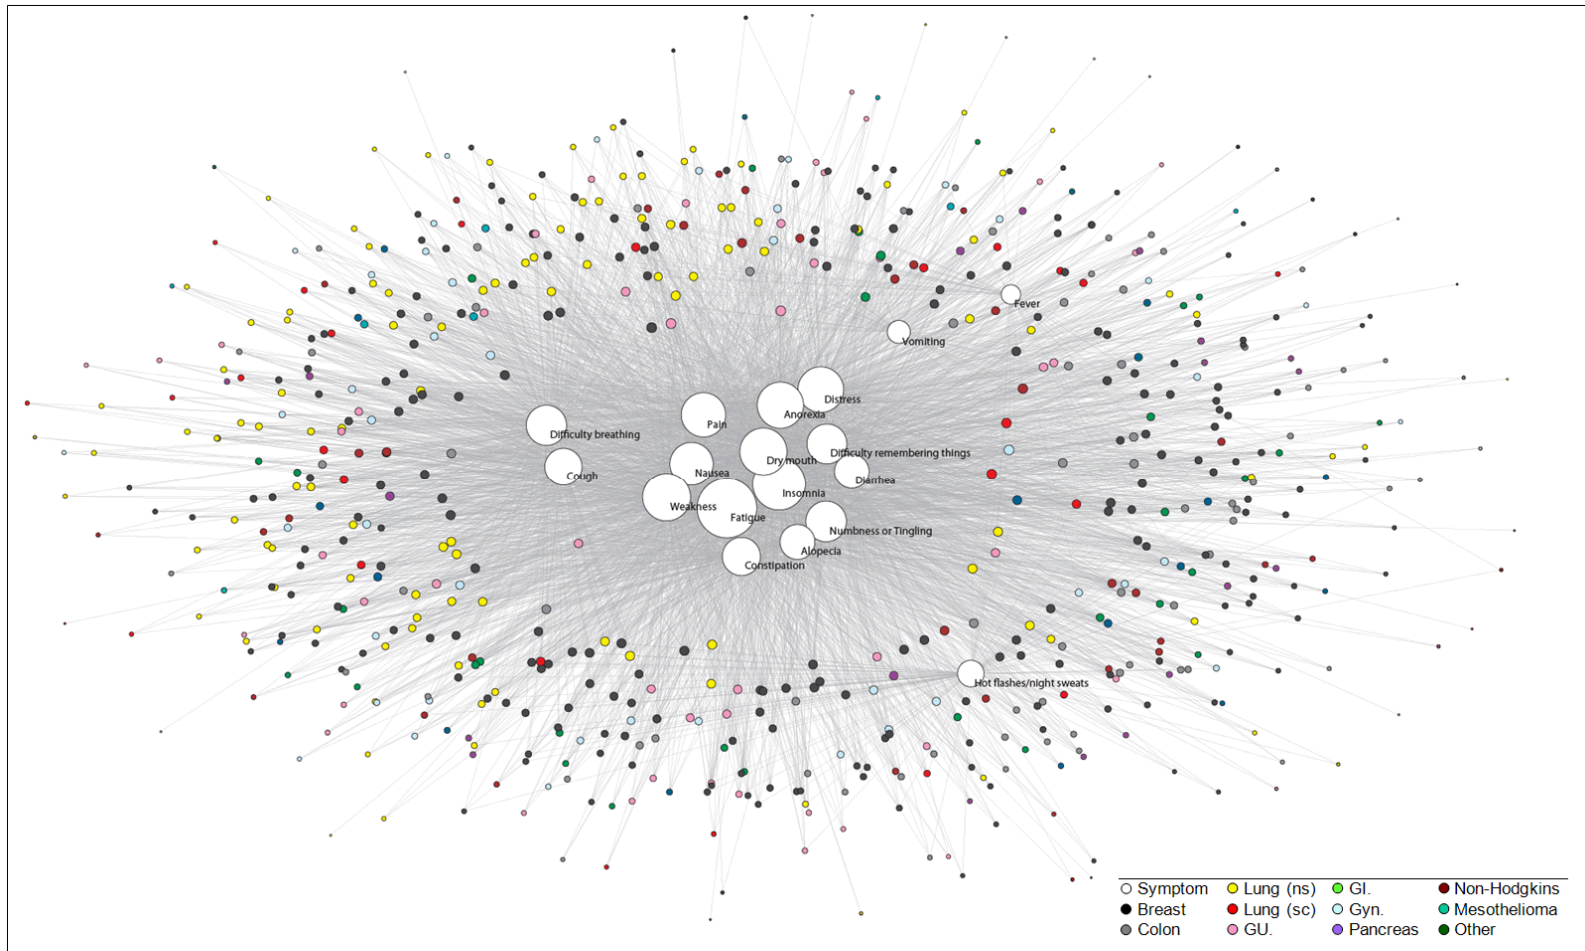

**Figure S1.** The patient-symptom bipartite network (similar to the one shown in Figure 2) shows how 18 symptoms (white nodes) co-occur across 665 patients (colored by each patient's type of cancer). The layout suggests that there exist no distinct clusters of patients based on cancer type.
